# Supplementary material
Source: Springer Nature journal article supplement (https://www.springermedizin.de/resource/supplementary/12967_2011_998_MOESM3_ESM.pdf/9573524)
Supplement: MOESM3 [file 9573524]

**A**

Cell number ↑

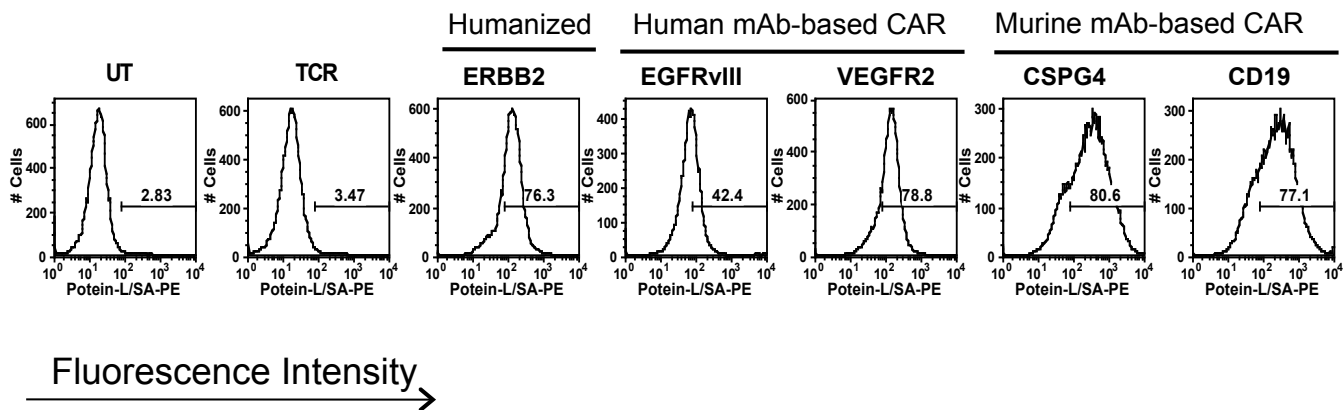**B**

Goat anti-mouse Fab

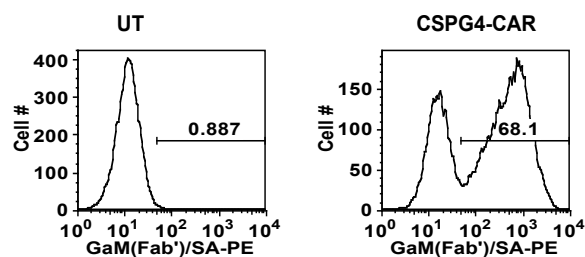**C**

ERBB2-Fc

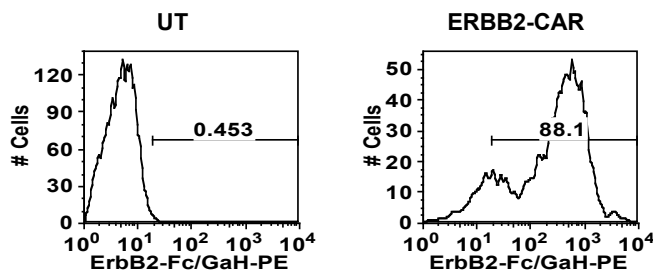

Cell number ↑

Protein L

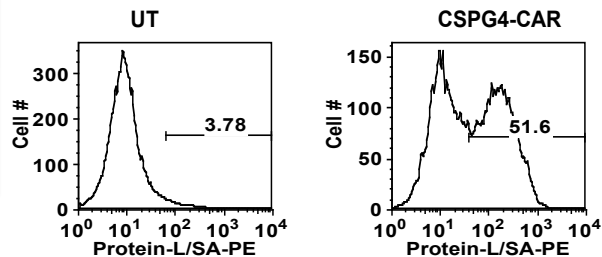

Protein L

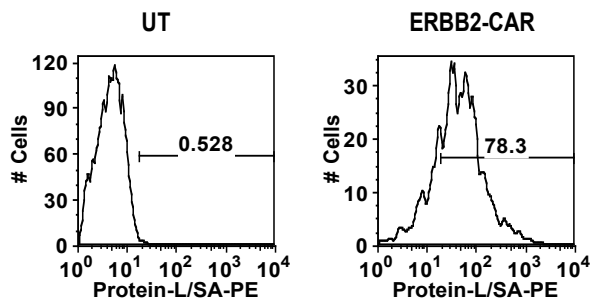

Fluorescence Intensity →
